# Supplementary material
Source: PubMed Central journal article supplement (PMC8862759)
Supplement: NIHMS1035726-supplement-S2.pdf [file NIHMS1035726-supplement-S2.pdf]

# **Supporting Information**

## Temporal Trends in Exposures to Six Phthalates from Biomonitoring Data: Implications for Cumulative Risk

Jeanette M. Reyes<sup>1</sup> and Paul S. Price<sup>2\*</sup>

<sup>1</sup>Oak Ridge Institute for Science and Education (ORISE) Research Participation Program, hosted at U.S. Environmental Protection Agency, Research Triangle Park, North Carolina 27711, United States

<sup>2</sup>Office of Research and Development, National Exposure Research Laboratory, U.S. Environmental Protection Agency, Research Triangle Park, North Carolina 27711, United States

\*Corresponding author: Paul Price, PhD, USEPA, 109 T.W. Alexander Drive, Research Triangle Park, NC 27709, USA; telephone: 919 541 5526; fax: 919 541 0239; email: price.pauls@epa.gov; ORCID: 0000-0001-5834-1025

Number of pages: 14

Number of figures: 4

Number of tables: 10

## Materials and Methods: Daily Intake Dose and Maximum Cumulative Ratio

In brief, as presented in Christensen et al.<sup>1</sup> the Daily Intake (DI) was calculated through adjusting metabolite concentrations of phthalates by creatinine concentrations while incorporating other variables such as daily creatinine excretion rates, the molar fraction of a given metabolite that was excreted, and information about the molecular weights of the metabolites and their parent phthalates. Under the assumption of steady state exposures, the DI for each participant  $i$  and metabolite  $k$  originating from parent phthalate  $j$  was calculated using the following equation:

$$DI_{i,j,k} = \left( [100 * (Met_{i,k}/Cr_i) * CE_i] / [F_{UE,i,k} * 1000] \right) \times (MW_{i,j} / MW_{i,j,k}) \quad (S1)$$

where  $DI_{i,j,k}$  ( $\mu\text{g}/\text{kg}/\text{d}$ ) in urine is the DI dose for metabolite  $k$ , 100 is a unit conversion,  $Met_{i,k}$  ( $\text{ng}/\text{mL}$ ) is the metabolite concentration as given in the NHANES data set,  $Cr_i$  ( $\text{mg}/\text{dL}$ ) is the creatinine concentration in urine as given in the NHANES data set,  $CE_i$  ( $\text{mg}/\text{kg}/\text{d}$ ) is the creatinine excretion per day as calculated by Mage et al.<sup>2</sup> using information about a participant's age, race/ethnicity, gender, weight, and height,  $F_{UE,i,k}$  (unitless) is the molar fraction of metabolite excreted, 1000 is a unit conversion,  $MW_{i,j}$  ( $\text{mg}/\text{mol}$ ) is the molecular weight of the parent phthalate, and  $MW_{i,j,k}$  ( $\text{mg}/\text{mol}$ ) is the molecular weight of the metabolite (Table S3). Among the phthalates that have multiple metabolites (i.e. DEHP and DINP), within an individual  $i$ , the value of  $DI_{i,j}$  was calculated by taking a weighted mean of the values of  $DI_{i,j,k}$  estimated from each metabolite  $k$  using  $F_{UE,i,k}$ .<sup>1,3</sup> The weighted mean was determined using the following equation:

$$DI_{i,j} = \sum_{k=1}^{n_k} \left( DI_{i,j,k} \times \frac{F_{UE,i,k}}{\sum_{l=1}^{n_k} F_{UE,i,l}} \right), \quad (S2)$$

where  $DI_{i,j}$  is the DI dose for phthalate  $j$  and  $n_k$  is the number of metabolites for a given parent phthalate. In this work,  $n_k \in \{1,2,4\}$ .

We used the NHANES convention of setting metabolite concentrations below the Limit of Detection (LOD) to  $LOD/\sqrt{2}$ , which is subject to change as different analytical methods are used to determine metabolites concentrations for different NHANES cycles (Table S6).

The Maximum Cumulative Ratio (MCR) will vary across individuals in an exposed population ranging from one to  $N$  (i.e.  $MCR_i \in [1, N]$ ), where  $N$  is the number of chemicals considered in the assessment. A value close to one indicates that one chemical was responsible for nearly all of the individual's cumulative risk and a value of  $N$  indicates that the individual receives an equitoxic dose from all chemicals.

This approach requires information on height and weight of the surveyed participants. A small number of participants were excluded for missing either height or weight information (ranging from 18 to 35 per cycle) or for missing metabolite information (ranging from 6 to 38 per cycle). After removing these participants, there is a total of 12,951 participants over five cycles of NHANES (Table S2).

### Materials and Methods: Sensitivity Analysis

The equation used to estimate the DI of a phthalate using Urinary Flow Rate (UFR) is:

$$DI_{i,j,k} = \left( \frac{60 * 24 * Met_{i,k} * UFR_i}{BW_i * F_{UE,i,k} * 1000} \right) \times \left( \frac{MW_{i,j}}{MW_{i,j,k}} \right) \quad (S3)$$

where,  $UFR_i$  is the urinary flow rate in ml/min for the participant  $i$  as reported by NHANES. UFRs are only available for the three most recent cycles of NHANES.

The methodology used to calculate the relative potency-weighted dose has been described elsewhere.<sup>4</sup> Benchmark Doses (BMDs) due to androgen disruption for DBP, DIBP, BBP, and DEHP were obtained from the literature.<sup>5</sup> The BMD for DINP was obtained from Varshavsky et al.,<sup>4</sup> who assumed that DINP was 2.3 less potent than DBP (Table S9).<sup>6</sup> DIDP is not a known androgen disruptor. Therefore, it was assumed to be ten times less potent than the least potent phthalate.

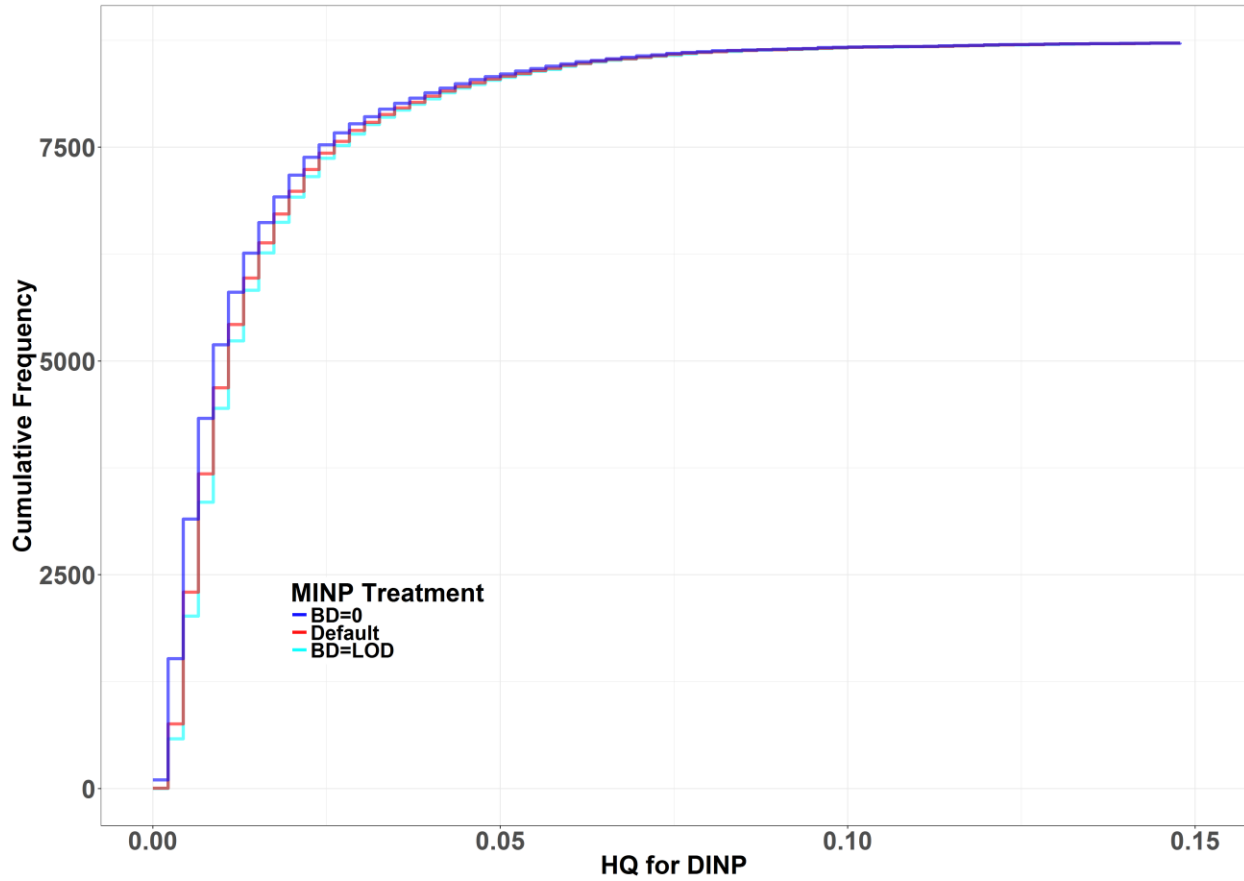

Figure S1: Cumulative frequency of different treatments of below-detects for the MINP metabolite and its corresponding influence on the Hazard Quotient (HQ) of its parent phthalate DINP from NHANES spanning from 2005-2014.

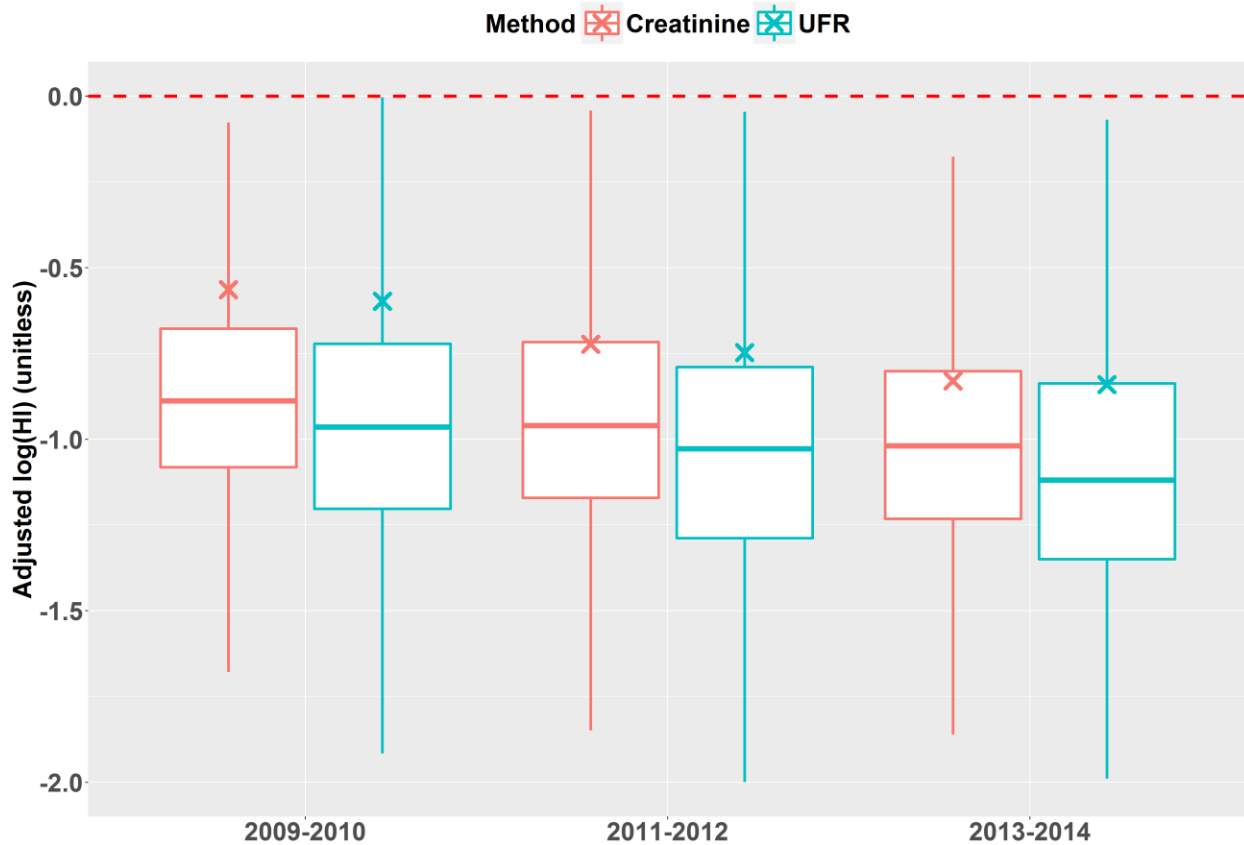

**Figure S2.** Population-wide boxplots of the log transform of the Hazard Index (HI) calculated by a creatinine correction approach and the Urinary Flow Rate (UFR) approach of the surveyed NHANES population presented by NHANES cycle spanning from 2009-2014 adjusted for the NHANES survey weighting factors. The boxplot is marked by the median, first and third quartile, and  $\pm 1.5 * IQR$  (Inter-Quartile Range). The logarithm of the arithmetic means is identified with an "X". The dashed, horizontal, red line indicates  $HI = 1$  (i.e.  $\log(HI) = 0$ ).

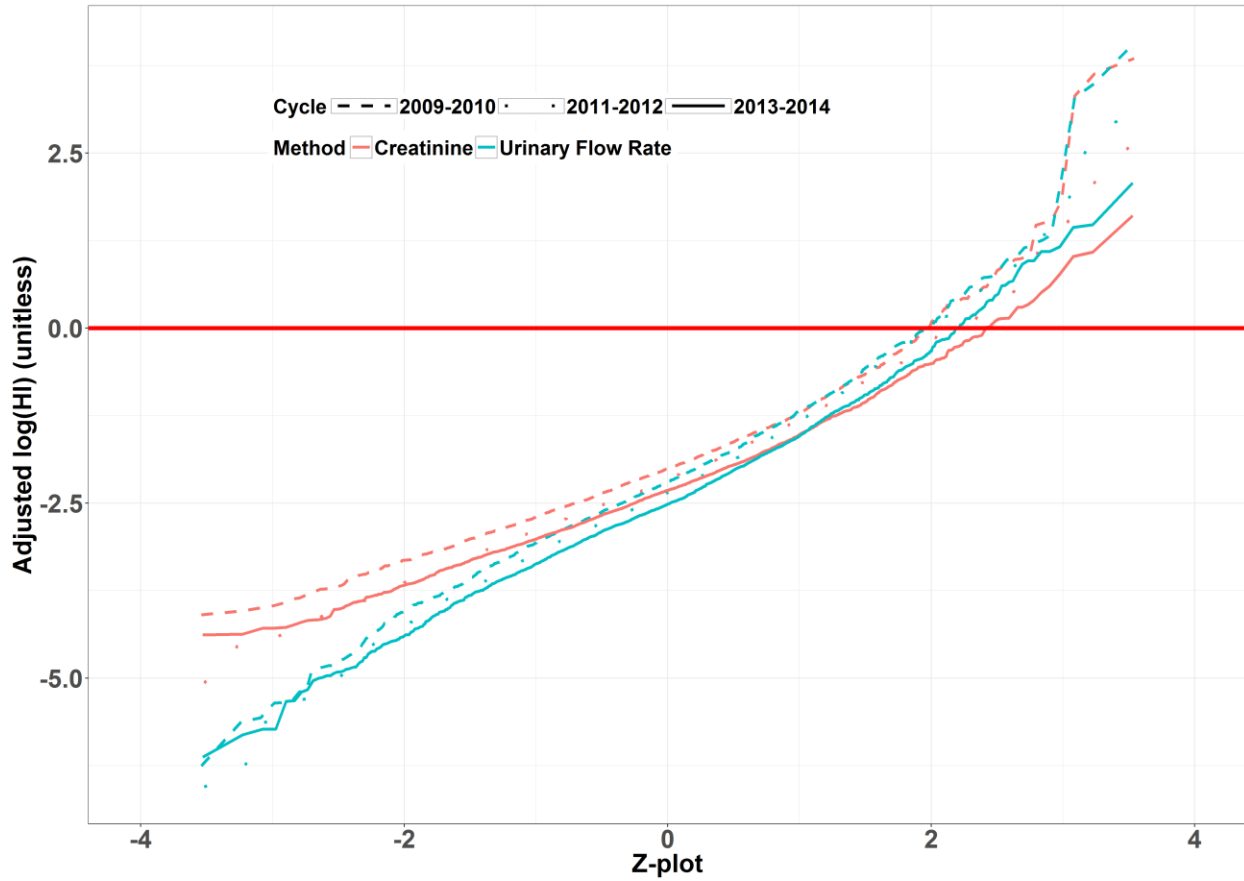

**Figure S3.** Z-plot of Hazard Indices (HIs) for the creatinine correction approach and the Urinary Flow Rate (UFR) adjusted by the NHANES survey weighting factors.

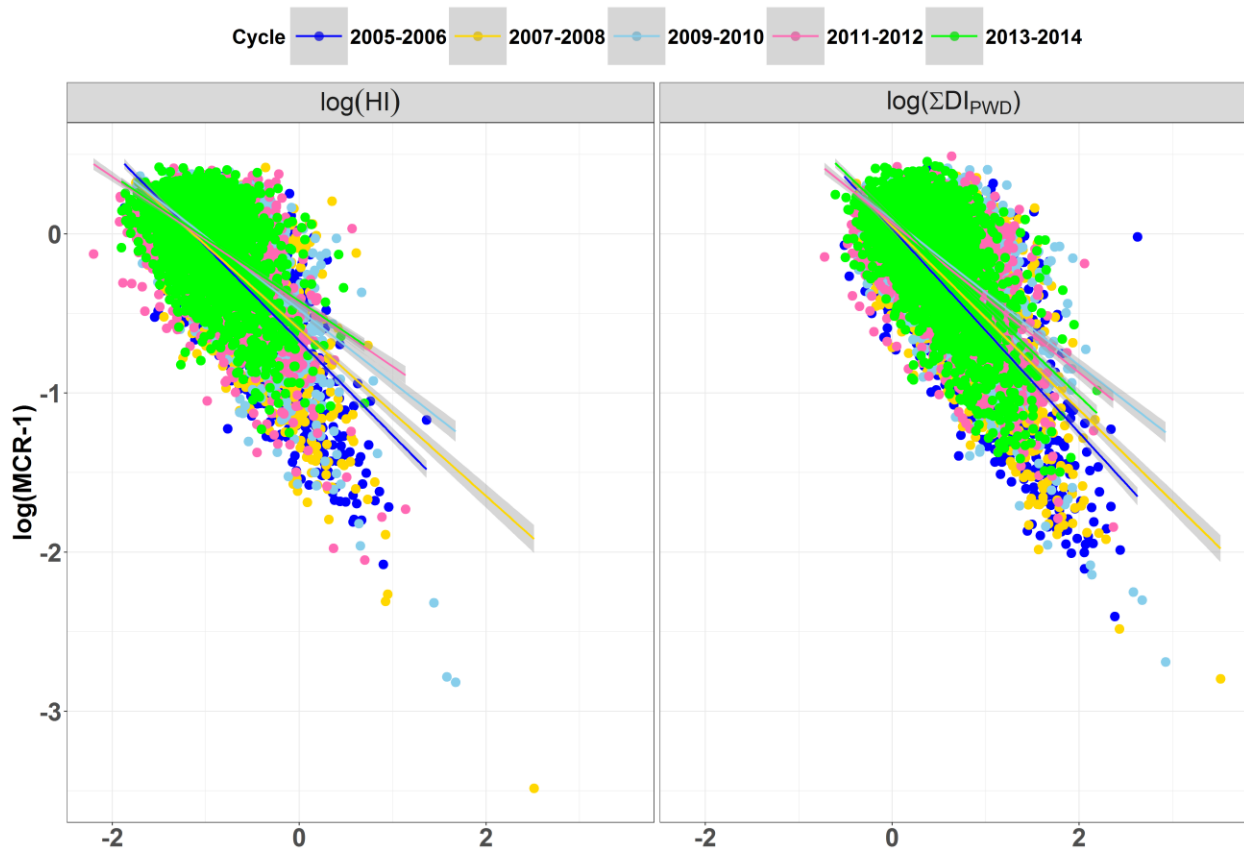

**Figure S4.** Plot of log Hazard Index (HI) versus  $\log(MCR - 1)$  of six phthalates for all participants from 2005-2014 identified by corresponding NHANES cycle of the participant using the Tolerable Daily Intakes (left panel) and Potency-Weighted Dose (PWD) (right panel). Regression lines are presented by NHANES cycle. (See Table S10 for regression estimates.)

**Table S1.** Frequency at which each of the six phthalates produced the maximum Hazard Quotient (HQ<sub>M</sub>) by Group among the NHANES participants across the cycles spanning from 2005-2014.

|            | HQ <sub>M</sub> | 2005-2006   | 2007-2008   | 2009-2010   | 2011-2012   | 2013-2014   |
|------------|-----------------|-------------|-------------|-------------|-------------|-------------|
| Group I    | DBP             | 8           | 13          | 14          | 7           | 0           |
|            | DEHP            | 103         | 62          | 33          | 8           | 3           |
|            | DIDP            | 0           | 1           | 0           | 1           | 1           |
|            | DINP            | 2           | 0           | 5           | 6           | 8           |
|            | BBP             | 0           | 0           | 0           | 0           | 0           |
|            | DIBP            | 0           | 0           | 0           | 0           | 0           |
|            | <b>Total</b>    | <b>113</b>  | <b>76</b>   | <b>52</b>   | <b>22</b>   | <b>12</b>   |
| Group II   | DBP             | 944         | 1028        | 1174        | 743         | 958         |
|            | DEHP            | 1394        | 1373        | 1105        | 886         | 712         |
|            | DIDP            | 18          | 23          | 34          | 29          | 25          |
|            | DINP            | 31          | 52          | 343         | 757         | 947         |
|            | BBP             | 0           | 0           | 0           | 0           | 0           |
|            | DIBP            | 0           | 0           | 0           | 0           | 0           |
|            | <b>Total</b>    | <b>2387</b> | <b>2476</b> | <b>2656</b> | <b>2415</b> | <b>2642</b> |
| Group IIIA | DBP             | 6           | 4           | 0           | 4           | 0           |
|            | DEHP            | 20          | 18          | 12          | 0           | 1           |
|            | DIDP            | 0           | 1           | 2           | 2           | 0           |
|            | DINP            | 4           | 1           | 2           | 10          | 5           |
|            | BBP             | 0           | 0           | 0           | 0           | 0           |
|            | DIBP            | 0           | 0           | 0           | 0           | 0           |
|            | <b>Total</b>    | <b>30</b>   | <b>24</b>   | <b>16</b>   | <b>16</b>   | <b>6</b>    |
| Group IIIB | DBP             | 0           | 2           | 0           | 0           | 1           |
|            | DEHP            | 0           | 1           | 0           | 1           | 1           |
|            | DINP            | 0           | 0           | 1           | 0           | 1           |
|            | BBP             | 0           | 0           | 0           | 0           | 0           |
|            | DIBP            | 0           | 0           | 0           | 0           | 0           |
|            | <b>Total</b>    | <b>0</b>    | <b>3</b>    | <b>1</b>    | <b>1</b>    | <b>3</b>    |

**Table S2.** Number of participants in the NHANES data set presented by Cycle.

| Cycle     | Total participants with at least one phthalate metabolite measured | Participants missing height and/or weight | Additional participants missing at least one phthalate metabolite | Total number of participants used in the analysis |
|-----------|--------------------------------------------------------------------|-------------------------------------------|-------------------------------------------------------------------|---------------------------------------------------|
| 2005-2006 | 2565                                                               | 18                                        | 17                                                                | 2530                                              |
| 2007-2008 | 2623                                                               | 25                                        | 19                                                                | 2579                                              |
| 2009-2010 | 2755                                                               | 24                                        | 6                                                                 | 2725                                              |
| 2011-2012 | 2527                                                               | 35                                        | 38                                                                | 2454                                              |
| 2013-2014 | 2691                                                               | 21                                        | 7                                                                 | 2663                                              |



**Table S3.** Data on parent phthalates, metabolites, Tolerable Daily Intakes (TDIs), molecular weights of phthalates and their metabolites, and percentages of urinary excretions for NHANES.

| Phthalate (Parent)                | TDI ( $\mu\text{g}/\text{kg}\cdot\text{d}$ ) | MW <sub>p</sub> (g/mole) | Metabolite                                                     | MW <sub>m</sub> (g/mole) | daily F <sub>UE</sub> (%) |
|-----------------------------------|----------------------------------------------|--------------------------|----------------------------------------------------------------|--------------------------|---------------------------|
| di-n-butyl phthalate (DBP)        | 10 <sup>7</sup>                              | 278.34                   | monobutyl phthalate (MBP) <sup>1,3</sup>                       | 222.24                   | 84                        |
| diisobutyl phthalate (DIBP)       | 1250 <sup>8</sup>                            | 278.34                   | monoisobutyl phthalate (MIBP) <sup>1,3</sup>                   | 222.24                   | 70.3                      |
| butyl benzyl phthalate (BBP)      | 500 <sup>9</sup>                             | 312.36                   | monobenzyl phthalate (MBZP) <sup>1,3</sup>                     | 256.25                   | 73                        |
| di(2-ethylhexyl) phthalate (DEHP) | 50 <sup>10</sup>                             | 390.56                   | mono(2-ethyl-5-carboxypentyl) phthalate (MECPP) <sup>1,3</sup> | 308.33                   | 13.2                      |
|                                   |                                              |                          | mono(2-ethyl-5-oxohexyl) phthalate (MEOHP) <sup>1,3</sup>      | 292.33                   | 10.9                      |
|                                   |                                              |                          | mono(2-ethyl-5-hydroxyhexyl) phthalate (MEHHP) <sup>1,3</sup>  | 294.35                   | 14.9                      |
|                                   |                                              |                          | mono(2-ethylhexyl) phthalate (MEHP) <sup>1,3</sup>             | 278.34                   | 6.2                       |
| diisononyl phthalate (DINP)       | 150 <sup>11</sup>                            | 418.61                   | monoisononyl phthalate (MINP) <sup>3</sup>                     | 292.37                   | 3                         |
|                                   |                                              |                          | mono(carboxyoctyl) phthalate (MCOP) <sup>1,3</sup>             | 322.36                   | 9.9                       |
| diisodecyl phthalate (DIDP)       | 130 <sup>12</sup>                            | 446.68                   | mono(carboxynonyl) phthalate (MCNP) <sup>3</sup>               | 336.38                   | 9.9                       |

**Table S4.** Group names, definition, and descriptions from the Hazard Index (HI), maximum Hazard Quotient ( $HQ_M$ ), and Maximum Cumulative Ratio (MCR) values for each participant (reproduced from Table 2 of Valotton and Price<sup>13</sup>).

| Group | Total Hazard | Individual Chemical Hazard | MCR          | Description                                                                  |
|-------|--------------|----------------------------|--------------|------------------------------------------------------------------------------|
| I     | $HI > 1$     | $HQ_M > 1$                 | ---          | The mixture presents a potential risk already based on individual components |
| II    | $HI \leq 1$  | $HQ_M \leq 1$              | ---          | The assessment does not identify a concern                                   |
| IIIA  | $HI > 1$     | $HQ_M \leq 1$              | $MCR < 2$    | The majority of the risk offered by the mixture is driven by one substance   |
| IIIB  | $HI > 1$     | $HQ_M \leq 1$              | $MCR \geq 2$ | The potential risk is driven by multiple components                          |

**Table S5.** Regressions used for the regression analysis<sup>14</sup> by NHANES cycle presented overall and by Age, Race/Ethnicity, and Gender. The following variables are categorical: Cycle (i.e. 2005-2006, 2007-2008, 2009-2010, 2011-2012, and 2013-2014), Age (i.e. 6-11, 12-19, and 20+), Gender (i.e. female and male), Race/Ethnicity (i.e. Mexican American, non-Hispanic White, and non-Hispanic Black), and Poverty Income Ratio (PIR) (i.e. <1, 1-3, and >3). Fasting is the number of whole hours since the participant last ate or drank anything other than water. Years is the participant's age in whole years.

| Presentation   | Regression                                                                                                                                     |
|----------------|------------------------------------------------------------------------------------------------------------------------------------------------|
| Overall        | $\ln(HI) \sim \text{Cycle}$                                                                                                                    |
| Age            | $\ln(HI) \sim \text{Cycle} + \text{Gender} + \text{Race/Ethnicity} + \text{PIR} + \text{Fasting} + \text{Cycle:Age}$                           |
| Race/Ethnicity | $\ln(HI) \sim \text{Cycle} + \text{Years} + \text{Gender} + \text{PIR} + \text{Race/Ethnicity} + \text{Fasting} + \text{Cycle:Race/Ethnicity}$ |
| Gender         | $\ln(HI) \sim \text{Cycle} + \text{Years} + \text{Race/Ethnicity} + \text{PIR} + \text{Fasting} + \text{Cycle:Gender}$                         |

**Table S6.** Limits of detection and number (%) of samples below the limit of detection presented by cycle for each of the 10 metabolites.

| Metabolite   | Limit of detection (ng/mL) |           |           |           |           | Number of samples (%) below the limit of detection |             |             |             |             |
|--------------|----------------------------|-----------|-----------|-----------|-----------|----------------------------------------------------|-------------|-------------|-------------|-------------|
|              | 2005-2006                  | 2007-2008 | 2009-2010 | 2011-2012 | 2013-2014 | 2005-2006                                          | 2007-2008   | 2009-2010   | 2011-2012   | 2013-2014   |
| MBZP (BBP)   | 0.216                      | 0.216     | 0.216     | 0.3       | 0.3       | 29 (1.14)                                          | 46 (1.78)   | 13 (0.47)   | 44 (1.79)   | 63 (2.36)   |
| MBP (DBP)    | 0.6                        | 0.6       | 0.4       | 0.4       | 0.4       | 7 (0.27)                                           | 19 (0.73)   | 12 (0.44)   | 136 (5.54)  | 43 (1.61)   |
| MEHP (DEHP)  | 1.2                        | 1.1       | 0.5       | 0.5       | 0.8       | 789 (31.1)                                         | 850 (32.9)  | 615 (22.5)  | 568 (23.1)  | 1003 (37.6) |
| MEOHP (DEHP) | 0.7                        | 0.6       | 0.2       | 0.2       | 0.2       | 26 (1.02)                                          | 44 (1.70)   | 8 (0.29)    | 9 (0.36)    | 13 (0.48)   |
| MECPP (DEHP) | 0.6                        | 0.5       | 0.2       | 0.2       | 0.4       | 1 (0.03)                                           | 2 (0.07)    | 1 (0.03)    | 7 (0.28)    | 6 (0.22)    |
| MEHHP (DEHP) | 0.7                        | 0.7       | 0.2       | 0.2       | 0.4       | 10 (0.39)                                          | 20 (0.77)   | 2 (0.07)    | 6 (0.24)    | 19 (0.71)   |
| MIBP (DIBP)  | 0.3                        | 0.3       | 0.2       | 0.2       | 0.8       | 52 (2.05)                                          | 47 (1.82)   | 4 (0.14)    | 23 (0.93)   | 72 (2.70)   |
| MCNP (DIDP)  | 0.6                        | 0.5       | 0.2       | 0.2       | 0.2       | 225 (8.89)                                         | 247 (9.57)  | 30 (1.10)   | 18 (0.73)   | 32 (1.20)   |
| MINP (DINP)  | 1.323                      | 1.232     | 0.77      | 0.5       | 0.9       | 2181 (86.2)                                        | 2297 (89.0) | 1672 (61.3) | 1013 (41.2) | 1586 (59.5) |
| MCOP (DINP)  | 0.7                        | 0.7       | 0.2       | 0.2       | 0.3       | 101 (3.99)                                         | 94 (3.64)   | 5 (0.18)    | 0 (0)       | 3 (0.11)    |

**Table S7.** Pairwise Bonferroni comparison test of the Least Squares Geometric Mean (LSGM) of the Hazard Index (HI) within demographics across fixed NHANES cycles.

| Demographic    | Contrast                                | 2005-2006           | 2007-2008           | 2009-2010          | 2011-2012          | 2013-2014          |
|----------------|-----------------------------------------|---------------------|---------------------|--------------------|--------------------|--------------------|
| Gender         | Male - Female                           | 0.034               | -0.107 <sup>b</sup> | 0.069              | 0.048              | -0.049             |
| Race/Ethnicity | Mexican American - Non-Hispanic White   | -0.151 <sup>a</sup> | -0.027              | -0.042             | -0.086             | -0.061             |
|                | Mexican American - Non-Hispanic Black   | -0.232 <sup>b</sup> | -0.077              | 0.001              | -0.154             | -0.039             |
|                | Non-Hispanic White - Non-Hispanic Black | -0.081              | -0.049              | 0.042              | -0.068             | 0.021              |
| Age            | 6-11 years - 12-19 years                | 0.298 <sup>b</sup>  | 0.356 <sup>c</sup>  | 0.357 <sup>c</sup> | 0.271 <sup>b</sup> | 0.433 <sup>c</sup> |
|                | 6-11 years - 20+ years                  | 0.430 <sup>c</sup>  | 0.490 <sup>c</sup>  | 0.466 <sup>c</sup> | 0.357 <sup>c</sup> | 0.585 <sup>c</sup> |
|                | 12-19 years - 20+ years                 | 0.132               | 0.134               | 0.109              | 0.086              | 0.152 <sup>a</sup> |

<sup>a</sup> $p < 0.05$ , <sup>b</sup> $p < 0.01$ , <sup>c</sup> $p < 0.001$

**Table S8.** Comparison of the frequency (%) of participants in Groups, Hazards Indices greater than one ( $HI > 1$ ), and slope between Maximum Cumulative Ratio (MCR) and HI between the creatinine correction method with the Urinary Flow Rate (UFR) method from the last three NHANES Cycles.

|                                                               | 2009-2010    |              | 2011-2012    |              | 2013-2014    |              |
|---------------------------------------------------------------|--------------|--------------|--------------|--------------|--------------|--------------|
|                                                               | Creatinine   | UFR          | Creatinine   | UFR          | Creatinine   | UFR          |
| <b>Count (%) of participants in each Group</b>                |              |              |              |              |              |              |
| Group I                                                       | 47 (1.88)    | 38 (1.52)    | 21 (0.91)    | 30 (1.3)     | 10 (0.42)    | 20 (0.83)    |
| Group II                                                      | 2438 (97.52) | 2439 (97.56) | 2275 (98.48) | 2255 (97.62) | 2377 (99.21) | 2361 (98.54) |
| Group IIIA                                                    | 14 (0.56)    | 18 (0.72)    | 13 (0.56)    | 16 (0.69)    | 6 (0.25)     | 9 (0.38)     |
| Group IIIB                                                    | 1 (0.04)     | 5 (0.20)     | 1 (0.04)     | 9 (0.39)     | 3 (0.13)     | 6 (0.25)     |
| Groups I and III ( $HI > 1$ )                                 | 62 (2.48)    | 61 (2.44)    | 35 (1.52)    | 55 (2.38)    | 19 (0.79)    | 35 (1.46)    |
| <b>Consistency of determination of <math>HI &gt; 1</math></b> |              |              |              |              |              |              |
| Both $HI > 1$                                                 | 37 (1.48)    |              | 21 (0.91)    |              | 13 (0.54)    |              |
| Both $HI < 1$                                                 | 2414 (96.56) |              | 2241 (97.01) |              | 2355 (98.29) |              |
| $HI_C > 1, HI_{UFR} \leq 1$                                   | 25 (1.00)    |              | 14 (0.61)    |              | 6 (0.25)     |              |
| $HI_C \leq 1, HI_{UFR} > 1$                                   | 24 (0.96)    |              | 34 (1.47)    |              | 22 (0.92)    |              |
| <b><math>\log(MCR-1)/\log(HI)</math> Slope</b>                |              |              |              |              |              |              |
|                                                               | -0.453       | -0.306       | -0.410       | -0.262       | -0.404       | -0.259       |

**Table S9.** Summary of benchmark doses and relative potency factors needed to calculate a DBP potency-weighted daily intake dose.

| Phthalate                         | Benchmark Dose   | Relative Potency Factor |
|-----------------------------------|------------------|-------------------------|
| di-n-butyl phthalate (DBP)        | 30 <sup>a</sup>  | 1.00 <sup>b</sup>       |
| diisobutyl phthalate (DIBP)       | 126 <sup>a</sup> | 0.24 <sup>b</sup>       |
| butyl benzyl phthalate (BBP)      | 116 <sup>a</sup> | 0.26 <sup>b</sup>       |
| di(2-ethylhexyl) phthalate (DEHP) | 49 <sup>a</sup>  | 0.61 <sup>b</sup>       |
| diisononyl phthalate (DINP)       | ---              | 0.26 <sup>b,c</sup>     |
| diisodecyl phthalate (DIDP)       | ---              | 0.024 <sup>d</sup>      |

<sup>a</sup>NRC; <sup>b</sup>Vashavksy et al.; <sup>c</sup>Hannas et al.; <sup>d</sup>One tenth of lowest Relative Potency Factor

**Table S10.** Intercept and slope using a simple linear regression between  $\log(\text{HI})$  or  $\log(\sum DI_{PWD})$  and  $\log(\text{MCR}-1)$  and mean Maximum Cumulative Ratio (MCR) from either 1) a Hazard Index (HI) calculated by a Tolerable Daily Intake (TDI) value or 2) a dose summation using a potency-weighted approach presented by NHANES Cycle. All estimates are highly significant (i.e.  $p < 0.001$ ).

| Cycle     | Intercept |                  | Slope  |                  | Mean MCR |                  |
|-----------|-----------|------------------|--------|------------------|----------|------------------|
|           | TDI       | Potency-Weighted | TDI    | Potency-Weighted | TDI      | Potency-Weighted |
| 2005-2006 | -0.671    | 0.033            | -0.594 | -0.641           | 1.711    | 1.563            |
| 2007-2008 | -0.596    | 0.048            | -0.526 | -0.576           | 1.767    | 1.636            |
| 2009-2010 | -0.476    | 0.088            | -0.457 | -0.457           | 1.962    | 1.837            |
| 2011-2012 | -0.435    | 0.070            | -0.397 | -0.471           | 1.996    | 1.800            |
| 2013-2014 | -0.421    | 0.103            | -0.395 | -0.561           | 2.077    | 1.874            |

**Additional File**

“Reyes\_EST\_Phthalates\_US\_SI\_data.xlsx” contains information in the following tabs:

1. **“data”** contains the following:
  - Data on the surveyed individuals from the original NHANES data files that includes
    - Identifying information for the individual;
    - Demographic information used in defining the creatinine levels and in investigating sub populations based on age, gender, race/ethnicity;
    - Concentration of phthalate metabolites and creatinine in urine.
  - Calculated values for each individual;
    - Daily intake of each of the six phthalates;
    - Hazard Quotients associated with each phthalate’s daily intake;
    - Values of Hazard Index and the Maximum Cumulative Ratio.
2. **“definitions”** contains the definitions and units of the fields in **“data”**.
3. **“metabolites”** contain information about the National Health and Nutrition Examination Survey (NHANES) metabolite code names along with Tolerable Daily Intake (TDI), molecular weight of the parent phthalate, molecular weight of the metabolite, and names and abbreviations of the corresponding metabolites and phthalates.

## References

- (1) Christensen, K. L. Y.; Makris, S. L.; Lorber, M. Generation of hazard indices for cumulative exposure to phthalates for use in cumulative risk assessment. *Regul. Toxicol. Pharmacol.* **2014**, *69* (3), 380–389.
- (2) Mage, D. T.; Allen, R. H.; Kodali, A. Creatinine corrections for estimating children's and adult's pesticide intake doses in equilibrium with urinary pesticide and creatinine concentrations. *J. Expo. Sci. Environ. Epidemiol.* **2008**, *18* (4), 360–368.
- (3) Qian, H.; Chen, M.; Kransler, K. M.; Zaleski, R. T. Assessment of chemical coexposure patterns based upon phthalate biomonitoring data within the 2007/2008 National Health and Nutrition Examination Survey. *J. Expo. Sci. Environ. Epidemiol.* **2015**, *25* (3), 249–255.
- (4) Varshavsky, J. R.; Zota, A. R.; Woodruff, T. J. A Novel Method for Calculating Potency-Weighted Cumulative Phthalates Exposure with Implications for Identifying Racial/Ethnic Disparities among U.S. Reproductive-Aged Women in NHANES 2001–2012. *Environ. Sci. Technol.* **2016**, *50* (19), acs.est.6b00522.
- (5) NRC. *Phthalates and Cumulative Risk Assessment: The Tasks Ahead*; National Research Council, Committee on the Health Risks of Phthalates: Washington, DC, 2008.
- (6) Hannas, B. R.; Lambricht, C. S.; Furr, J.; Howdeshell, K. L.; Wilson, V. S.; Gray, L. E. Dose-response assessment of fetal testosterone production and gene expression levels in rat testes following In Utero exposure to diethylhexyl phthalate, diisobutyl phthalate, diisoheptyl phthalate, and diisononyl phthalate. *Toxicol. Sci.* **2011**, *123* (1), 206–216.
- (7) EFSA. Opinion of the Scientific Panel on Food Additives, Flavourings, Processing Aids and materials in Contact with Food on a request from the Commission related to Di-Butylphthalate (DBP) for use in food contact materials. *Eur. Food Saf. Auth. J.* **2005**, No. 299, 1–17.
- (8) Saillenfait, A. M.; Sabaté, J. P.; Gallissot, F. Diisobutyl phthalate impairs the androgen-dependent reproductive development of the male rat. *Reprod. Toxicol.* **2008**, *26* (2), 107–115.
- (9) EFSA. Opinion of the Scientific Panel on food additives, flavourings, processing aids and materials in contact with food (AFC) on a request from the Commission related to Butylbenzylphthalate (BBP) for use in food contact materials. *Eur. Food Saf. Auth. J.* **2005**, No. 241, 1–14.
- (10) EFSA. Opinion of the scientific panel on food additives, flavourings, processing aids and materials in contact with food on a request from the Commission related to Bis(2-ethylhexyl)phthalate (DEHP) for use in food contact materials. *Eur. Food Saf. Auth. J.* **2005**, No. 243, 1–20.
- (11) EFSA. Opinion of the Scientific Panel on food additives, flavourings, processing aids and materials in contact with food (AFC) on a request from the Commission related to Di-isononylphthalate (DINP) for use in food contact materials. *Eur. Food Saf. Auth. J.* **2005**, No. 244, 1–18.
- (12) CPSC. Overview of Phthalates Toxicity. **2010**. <https://www.cpsc.gov/s3fs-public/phthalover.pdf>
- (13) Vallotton, N.; Price, P. S. Use of the Maximum Cumulative Ratio As an Approach for Prioritizing Aquatic Coexposure to Plant Protection Products: A Case Study of a Large Surface Water Monitoring Database. *Environ. Sci. Technol.* **2016**, *50* (10), 5286–5293.
- (14) Zota, A. R.; Calafat, A. M.; Woodruff, T. J. Temporal trends in phthalate exposures: Findings from the national health and nutrition examination survey, 2001-2010. *Environ. Health Perspect.* **2014**, *122* (3), 235–241.
- (15) Hannas, B. R.; Lambricht, C. S.; Furr, J.; Evans, N.; Foster, P. M. D.; Gray, E. L.; Wilson, V. S. Genomic biomarkers of phthalate-induced male reproductive developmental toxicity: A targeted RT-PCR array approach for defining relative potency. *Toxicol. Sci.* **2012**, *125* (2), 544–557.
